# Supplementary material
Source: PubMed Central journal article supplement (PMC3838254)
Supplement: JVI.01740-13_zjv999098428so1.pdf [file JVI.01740-13_zjv999098428so1.pdf]

# Supplementary Figure S1

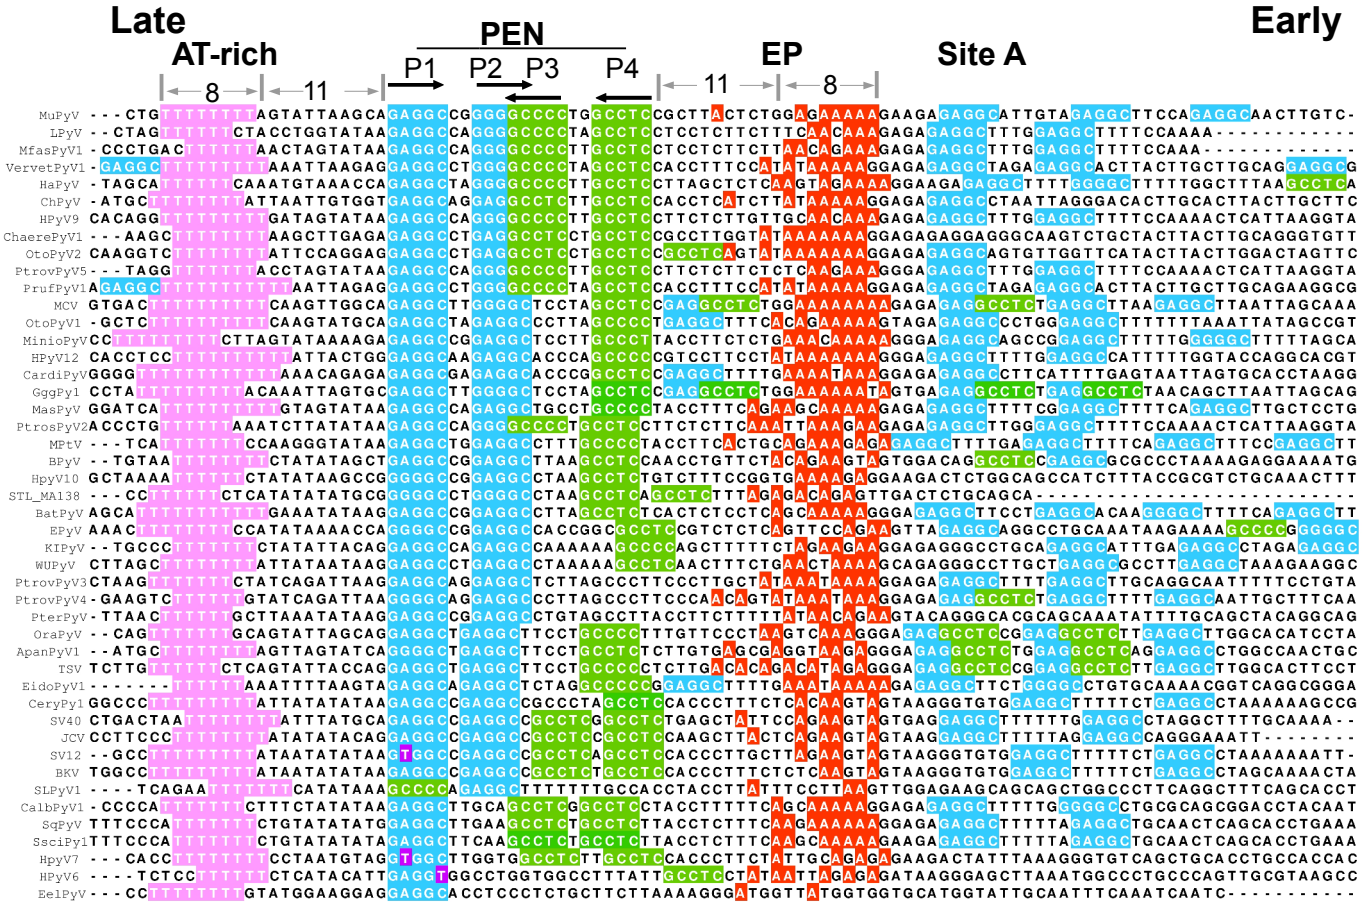

**Figure S1.** Nucleotide sequence alignment of 46 polyomavirus origins of replication.

The late and early sides of the origins are indicated. The AT-rich, the central pentamer sequences (PEN), and the EP regions are indicated. The adjacent site A region is also indicated. The sequences were manually aligned based on the P1 GAGGC pentamer. G(A/G)GC sequences and their reverse complement are colored blue and green. Imperfect GAGGCs in P1 are indicated by highlighting the nucleotide in purple. Poly(T) sequences on the late side of the origin are colored magenta. Adenosine nucleotides on the opposite side of the PEN origin are colored red. The name of the polyomavirus, its abbreviation, and its Genbank accession number is given in Supplemental Table 2.

## Supplemental Figure S2.

A.

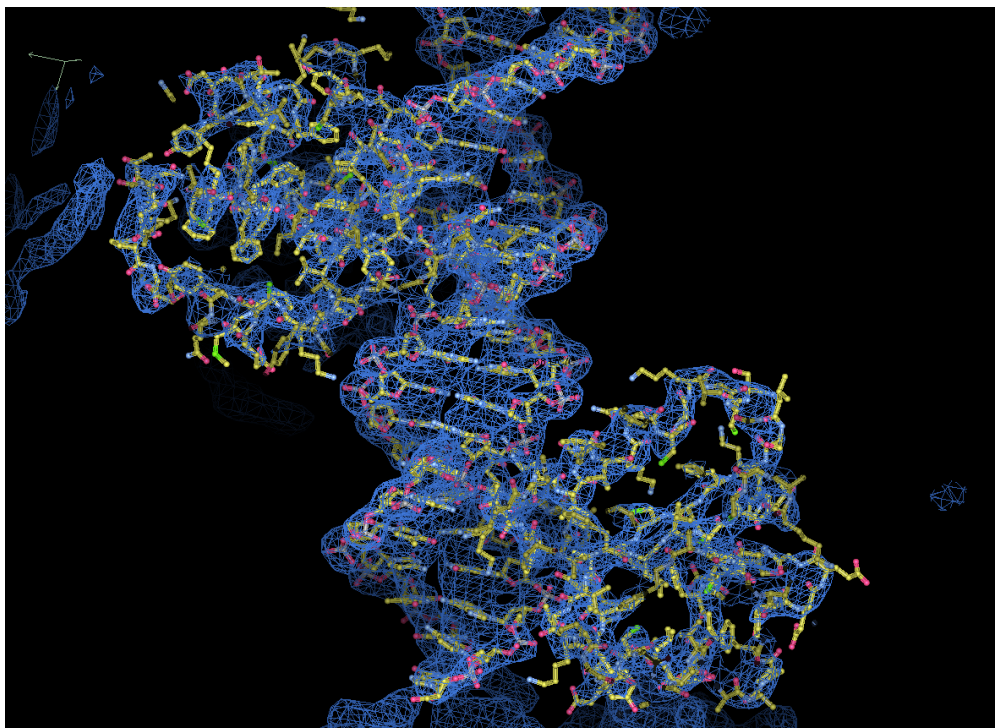

B.

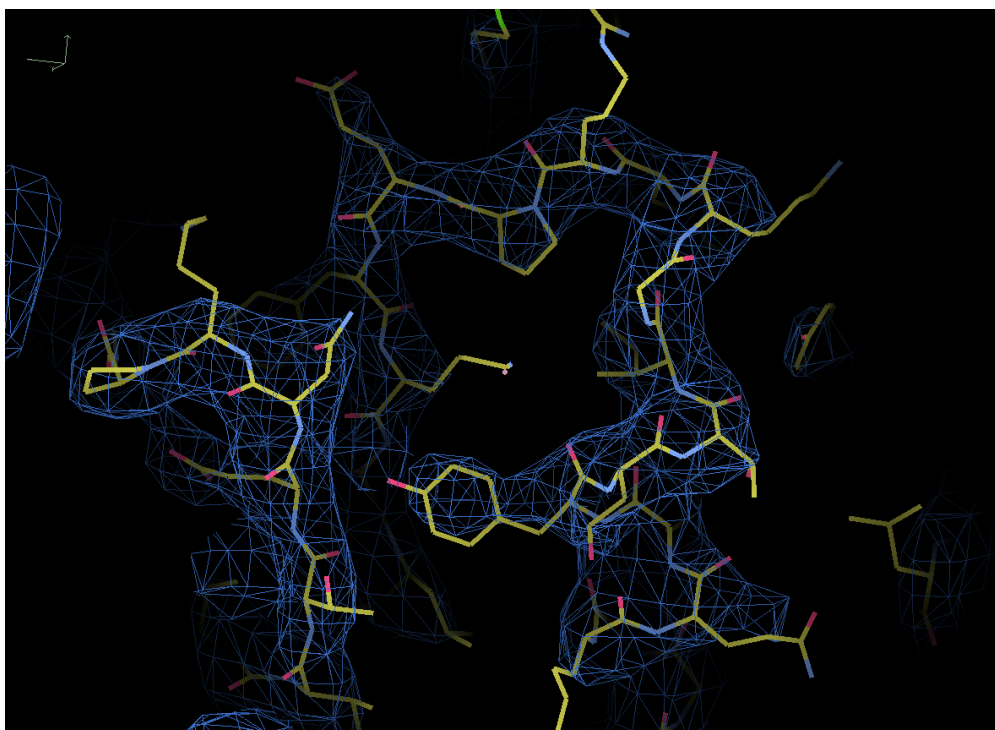

**Figure S2.** 2Fo-Fc Electron density from the Py DNA/OBD complex. In both figures the density was calculated using Coot and it is displayed at approximately 2 sigma in Coot. No density masking has been applied.

**A.** Electron density for much of the DNA as well as the origin binding domains bound to sites P1 and P2. The unoccupied P3 is also shown. The large solvent channels in the crystal are evident in this figure.

**B.** A blowup of some of the density in the obd.

## Supplementary Table S1

### X-ray Data Collection and Refinement Statistics.

| <b>Py OBD + 26mer ORI Duplex DNA</b> |                               |
|--------------------------------------|-------------------------------|
| <b>Data collection</b>               | $\lambda = 1.075 \text{ \AA}$ |
| Space group                          | C 2 2 2 <sub>1</sub>          |
| Cell dimensions                      |                               |
| <i>a, b, c</i> (Å)                   | 165.150 167.922 77.728        |
| $\alpha, \beta, \gamma$ (°)          | 90.0 90.0 90.0                |
| Resolution (Å)                       | 50.00 – 3.79 (3.94 – 3.79)    |
| $R_{\text{merge}}$                   | 17.0% (75.9%)                 |
| $I / \sigma I$                       | 28.2 (1.4)                    |
| Completeness (%)                     | 99.83 (99.89)                 |
| Redundancy                           | 14.3 (14.6)                   |
| <b>Refinement</b>                    |                               |
| Resolution (Å)                       | 46.93 – 3.79                  |
| No. reflections                      | 11,080                        |
| Completeness (%)                     | 99.89% (99.53%)               |
| $R_{\text{work}} / R_{\text{free}}$  | 0.2218 / 0.2444               |
| R.m.s. deviations                    |                               |
| Bond lengths (Å)                     | 0.005                         |
| Bond angles (°)                      | 1.035                         |

**Values in parentheses are for the highest resolution bin.**

Supplemental Table 2

| <b>Polyomavirus name</b>                              | <b>Abbreviation</b> | <b>Host</b>             | <b>Accession #</b> |
|-------------------------------------------------------|---------------------|-------------------------|--------------------|
| African green monkey polyomavirus                     | LPyV                | African green monkey    | NC_004763          |
| Ateles paniscus polyomavirus 1                        | ApanPyV1            | Red-faced spider monkey | NC_019853          |
| BK polyomavirus                                       | BKPyV               | Human                   | NC_001538          |
| Bovine polyomavirus                                   | BPyV                | Bovine                  | NC_001442          |
| California sea lion polyomavirus 1                    | SLPyV1              | Sea Lion, California    | NC_013796          |
| Cardioderma polyomavirus                              | CardiPyV            | Bat, Heart-nosed        | NC_020067          |
| Cebus albifrons polyomavirus 1                        | CalbPyV1            | White-fronted capuchin  | NC_019854          |
| Cercopithecus erythrotis polyomavirus 1               | CeryPyV1            | Red-eared guenon        | JX159985           |
| Chaerephon polyomavirus 1                             | ChaeroPyV1          | Bat, Free-tailed        | NC_020065          |
| Chimpanzee polyomavirus                               | ChPyV               | Chimpanzee              | NC_014743          |
| Eidolon polyomavirus 1                                | EidoPyV1            | Bat                     | NC_020068          |
| Equine polyomavirus                                   | EPyV                | Equine                  | NC_017982          |
| Gorilla gorilla gorilla polyomavirus 1                | GggPyV1             | Gorilla                 | HQ385752           |
| Hamster polyomavirus                                  | HaPyV               | Hamster                 | NC_001663          |
| Human polyomavirus 12                                 | HPyV12              | Human                   | NC_020890          |
| Human polyomavirus 9                                  | HPyV9               | Human                   | NC_015150          |
| Human Polyomavirus HPyV6                              | HPyV6               | Human                   | NC_014406          |
| Human Polyomavirus HPyV7                              | HPyV7               | Human                   | NC_014407          |
| Japanese eel endothelial cells-infection polyomavirus | EelPyV              | Japanese Eel            | NC_015123          |
| JC polyomavirus                                       | JCPyV               | Human                   | NC_001699          |
| KI polyomavirus                                       | KIPyV               | Human                   | NC_009238          |
| Macaca fascicularis polyomavirus 1                    | MfasPyV1            | Crab-eating macaque     | NC_019851          |
| Mastomys polyomavirus                                 | MasPyV              | Mouse                   | AB_588640          |
| Merkel cell polyomavirus                              | MCPyV (MCV)         | Human                   | NC_010277          |
| Miniopterus polyomavirus                              | MinioPyV            | Bat                     | NC_020069          |
| Murine pneumotropic virus                             | MPTV                | Mouse                   | NC_001505          |
| Murine polyomavirus                                   | MuPyV               | Mouse                   | NC_001515          |
| MW polyomavirus                                       | HPyV10              | Human                   | NC_018102          |
| Myotis polyomavirus VM-2008                           | BatPyV (MyPyV)      | Bat                     | NC_011310          |
| Orangutan polyomavirus                                | OraPyV              | Orangutan               | NC_013439          |
| Otomops polyomavirus 1                                | OtoPy1              | Bat                     | NC_020071          |
| Otomops polyomavirus 2                                | OtoPy2              | Bat                     | NC_020066          |
| Pan troglodytes schweinfurthii polyomavirus 2         | PtrosPyV2           | Eastern Chimpanzee      | NC_019858          |
| Pan troglodytes verus polyomavirus 3                  | PtrovPyV3           | Western Chimpanzee      | NC_019855          |
| Pan troglodytes verus polyomavirus 4                  | PtrovPyV4           | Western Chimpanzee      | NC_019856          |
| Pan troglodytes verus polyomavirus 5                  | PtrovPyV5           | Western Chimpanzee      | NC_019857          |
| Piliocolobus rufomitratu polyomavirus 1               | PrufPyV1            | Eastern Red Colobus     | NC_019850          |
| Pteronotus polyomavirus                               | PterPyV             | Bat                     | NC_020070          |
| Saimiri sciureus polyomavirus 1                       | SsciPyV1            | Squirrel Monkey         | JX159989           |
| Simian Agent 12                                       | SA12                | Vervet monkey, Baboon   | NC_007611          |
| Simian virus 40                                       | SV40                | Rhesus Monkey           | NC_001669          |
| Squirrel monkey polyomavirus                          | SqPyV               | Squirrel Monkey         | NC_009951          |
| STL polyomavirus                                      | STLPyV              | Human                   | NC_020106          |
| Trichodysplasia spinulosa-associated polyomavirus     | TSPyV               | Human                   | NC_014361          |
| Vervet monkey polyomavirus 1                          | VervetPyV1          | Vervet monkey           | NC_019844          |
| WU Polyomavirus                                       | WUPyV               | Human                   | NC_009539          |
